# 1 **Comprehensive Study of Acute Myocardial Infarctions Triggers**

2 Kamal Khademvatani<sup>1</sup>, Amin Sedokani<sup>1\*</sup>, Sima Masudi<sup>2</sup>, Parisa Nejati<sup>1</sup>

3 <sup>1</sup> Department of Cardiology, School of Medicine, Seyedoshohada Hospital, Urmia University  
4 of Medical Sciences, IRAN.

5 <sup>2</sup> Department of Biostatistics and Epidemiology, School of Medicine, Urmia University of  
6 Medical Sciences, IRAN.

7

## 8 **Correspondence:**

9 Amin Sedokani

10 Department of Cardiology, School of Medicine, Seyedoshohada Hospital, Urmia University  
11 of Medical Sciences, IRAN.

12 Email: [A.sedokani@gmail.com](mailto:A.sedokani@gmail.com)

13 Address: 17 Sharivar St., Urmia, IRAN (Postal Code: 571478334)

14 Phone: +98 443 237 5907

15 Fax: +98 443 237 2917

16

## 17 **IRB information**

18 All of the stages of the study were under supervision and confirmation of the  
19 ethical committee of Seyedoshohada heart center and Urmia University of  
20 Medical Sciences, certificated ethical committee of Institutional Review Board,  
21 with the reference ID of [IR.UMSU.REC](#). The study has met the principles  
22 outlined in the Declaration of Helsinki.

1 **Abstract**

2 **Background:** Myocardial infarction (MI) is one of the important cardiovascular  
3 diseases. A trigger is an external stimulus, potential to create a pathological  
4 change leading to a clinical event. In addition to the risk factors of myocardial  
5 infarction, MI triggers play critical roles in the incidence of acute MI.

6 **Methods and Results:** This is a cross-sectional study of patients with the first  
7 acute myocardial infarction in Seyedoshohada heart center of Urmia, Iran. 254  
8 patients were enrolled in the study within one year of study. After 48<sup>h</sup> of  
9 hospitalization, the patients were provided with the questionnaire to collecting  
10 the history of the disease ad triggers. Out of 220 (86.4%) patients with STEMI  
11 and 34 (13.6%) patients with NSTEMI, there were significant differences (p  
12 <0.05) in AMI triggers with LVEF (0.03), gender (0.027), residency and living  
13 area (0.039), occupation (0.002), smoking (0.008), abnormal serum TG levels  
14 (0.018) and the season of AMI occurrence (0.013). The mean age for AMI  
15 patients was 60.4±12.97 years old with a mean BMI of 26.65±4.35 kg/m<sup>2</sup>.

16 **Conclusion:** In addition to classic risk factors of myocardial infarction, health  
17 care systems must pay more attention to triggers that may induce an acute  
18 myocardial infarction in people with predisposing factors especially in the male  
19 sex, stressful and hand working jobs, and psychological and mental tension  
20 patients.

## 1 **Introduction**

2 Over the last decade, cardiovascular disease (CVD) has become the first cause  
3 of death across the world [1, 2]. Myocardial infarction (MI) is one of the most  
4 important cardiovascular diseases. Myocardial infarction is recognized by  
5 clinical features, a rise of serum necrosis biomarkers of cardiac myocytes, and  
6 by aging, or pathological studies [3]. Today, the main pathophysiology of acute  
7 myocardial infarction (AMI) is almost well-known to all and the importance of  
8 chronic process leading to myocardial infarction is known and there is a wide  
9 agreement on it, but there is another basic question about the relationship  
10 between some acute stresses, activities or circumstances (called triggers) and  
11 AMI in the patients with predisposing factors. By the way, some studies have  
12 demonstrated that increase hospital admission after acute emotional stresses,  
13 such as natural and industrial disasters and terroristic attacks [4].

14 A trigger is an external stimulus, potential to create a pathological change  
15 leading to a clinical event [5]. In addition to the effects of long-term stressors  
16 such as prolonged exposure to high levels of air pollution, many studies have  
17 shown that there is a significant increase in the risk of cardiovascular events  
18 immediately after behavioral, environmental, and psychological stimuli [4, 6-8].  
19 After studies demonstrated an increase in the incidence of myocardial infarction  
20 after the Athens earthquake, lots of studies were done on this case such as;  
21 circadian variation and onset of AMI [9], emotional triggering [10] relationship  
22 between cocaine use and immediate AMI [11, 12], or the relationship between  
23 anger and acute coronary events [13].

24 According to the prevalence of cardiovascular and coronary heart disease in  
25 mortality, morbidity, and cost to health systems, with studying of stimulators  
26 that mostly are depended to lifestyles and cultures, surely with declaring of  
27 triggers leading to CHDs with extended epidemiological studies, health systems  
28 can increase public knowledge of the risk and by adding preventive and

1 therapeutic plans to the patient treatment processes, can significantly decrease  
2 the incidence of a cardiovascular event and improve health services.

### 3 **Material and Methods**

4 A total number of 254 patients with acute myocardial infarction were enrolled  
5 in the study. The enrolled patients were all of the patients with AMI referred to  
6 Seyedoshohada heart center of West Azarbayjan of Iran through one year. After  
7 the approval of the study proposal in the research and ethics committee of  
8 Urmia medical sciences university and obtaining an ethics code for the designed  
9 questionnaire, the study began. The enrolling process was performed on patients  
10 admitted to the cardiac care units (CCU) and 48h was passed after their  
11 hospitalization with a proven diagnosis of acute myocardial infarction with  
12 clinical, paraclinical and ECG specific signs and symptoms. After ensuring the  
13 proper treatment of patients, the questionnaire was used to collect information  
14 from patients. In this study, patients who were not able to respond due to the  
15 severity of the disease or cognitive impairment, as well as patients who were re-  
16 hospitalized after discharge or a sign or history of previous MI in the ECG (Q  
17 waves or static ST elevation), echocardiography, nuclear imaging or medical  
18 profile, were also excluded from the study.

#### 19 **Paraclinical data**

20 For assessment of hypertension, a history of previously known disease and non-  
21 invasive pressure monitoring used in CCU. Diagnosis of diabetes mellitus (DM)  
22 also, was assessed by the history of previous disease, classic signs (polyuria,  
23 polydipsia, and polyphagia) and paraclinical measuring of HbA1C of  $\geq 6.4\%$ ,  
24 FBS of  $\geq 126\text{mg/dL}$  and/or random BS of  $\geq 200\text{mg/dL}$ .

25 In the study, we defined hypercholesterolemia as total cholesterol of  
26  $>200\text{mg/dL}$ , low serum HDL levels as HDL of  $<50\text{mg/dL}$  for women and  
27  $<40\text{mg/dL}$  for men. For serum triglycerides, we regrouped patients as with

1 normal TG and with abnormal levels of serum TG with a cutoff point of  
2 <150mg/dL for normal and  $\geq$ 150mg/dL for borderline and high levels of TG  
3 (abnormal levels of serum TG). Also, we determined LDL normal cutoff as  
4 below 130. For levels equal to or higher than 130, we placed them in a high  
5 LDL group.

## 6 **Triggers**

7 At first, we divided triggers into 7 groups including; ‘Heavy Activity, Receiving  
8 Bad News, Overdosing of Drugs or Opiates, Insomnia or Mental tensions,  
9 Argue, Anger or Fight, Noisy Party or Overeating, and No triggers’ and we  
10 reported the descriptive analysis in the results. But due to the small size of each  
11 group, we regrouped them as Physical triggers, Mental triggers, and No triggers  
12 for final analysis.

## 13 **Ethical Statement**

14 All of the stages of the study were under supervision and confirmation of the  
15 ethical committee of Seyedoshohada heart center and [Urmia University of](#)  
16 [Medical Sciences](#) (certificated ethical committee of Institutional Review Board).  
17 After all the patients were provided with written and oral explanations, they  
18 received written consent (informed written consent was given prior to the  
19 inclusion of subjects in the study). All patients had the opportunity to withdraw  
20 from the study at any time. Patient information remained confidential. There  
21 was not any intervention or extra cost to patients. The study has met the  
22 principles outlined in the Declaration of Helsinki.

## 23 **Data Analysis**

24 The reported values are mean  $\pm$  standard deviation and P-value are estimated  
25 based on one-way ANOVA. The reported values for other variables in the table  
26 are number (%), and P-values are estimated based on chi-square test.

## 1 **Results**

2 Due to the small number of patients in subgroups, we separated all 254 patients  
3 into 3 groups of anterior and inferior ST elevated MI and non-ST elevated MI  
4 (Fig 1). Fig 2 shows the distribution of monthly and seasonal AMI. The  
5 demographical, clinical and paraclinical data are presented in table 1.  
6 Distribution of last 24 hours triggers, revealed that almost half of patients  
7 (53.6%) had no activity of known types. In another hand, 46.4% of patients had  
8 a mental or physical trigger for AMI. The incidence of AMI was 3 times bigger  
9 in men.

### 10 **Age**

11 The mean age for AMI patients was  $60.4 \pm 12.97$  years old. There was no  
12 significant relationship between the age of the patients with trigger type for  
13 AMI (P-value = 0.107).

### 14 **Body Mass Index**

15 The mean BMI for the AMI patients were  $26.65 \pm 4.35$  kg/m<sup>2</sup> ( $26.40 \pm 4.26$  for  
16 men and  $27.40 \pm 4.55$  for women). There were no significant differences in BMI  
17 of the patients with trigger types of AMI (P-value = 0.351).

### 18 **Ejection Fraction**

19 The mean left ventricle ejection fraction (LVEF) for the AMI patients was  
20  $36 \pm 10.4$  %. The differences between the mean EF of the AMI patients were  
21 significant. So, the EF of the patients with no trigger was significantly lower  
22 than patients with physical and mental AMI triggers (P-value = 0.03).

### 23 **Gender**

24 In both genders, most patients did not have any triggers in the last 24 hours  
25 before AMI (61.9% of women and 50.8% of men respectively). The mental  
26 trigger was the most common in both sexes. But, in men, the physical trigger  
27 was significantly more than women (P-value = 0.027).

1 **Residency area**

2 Our results indicated that the type of AMI trigger can relate to the area of  
3 residency or living (urban or rural). So, mental triggering in urban living is  
4 significantly higher than physical triggers (31.9% vs. 12.9% respectively, P-  
5 value = 0.039).

6 **Occupation**

7 In our study, we assessed the AMI patient occupations to find out whether there  
8 is a relationship between job and AMI triggering or not. Generally, in the trigger  
9 positive patients, mental triggering was more common than physical triggering.  
10 But in retired or housewife patients, physical triggers are much less than mental  
11 triggers. The differences between occupations and AMI triggers was significant  
12 (P-value = 0.002)

13 **Diabetes mellitus**

14 In our study 23.4% of patients had diabetes mellitus (18.61% of men and 37.5%  
15 of women, P-value = 0.002). Despite gender, our results showed that there are  
16 no significant differences between DM and the AMI triggering (P-value =  
17 0.368).

18 **Hypertension**

19 In AMI patients 41.12% had HTN (36.12% of men and 55.5% of women, P-  
20 value = 0.009). There was no significant relationship between trigger types and  
21 AMI triggering (P-value = 0.351).

22 **Smoking**

23 In our study, there was a significant difference in the AMI triggers in smoking  
24 and non-smoking patients. So, the physical triggers were more common in  
25 smokers than non-smokers (P-value = 0.008).

## 1 **Cardiovascular disease history in the family.**

2 Most of the patients with and without CVD history in the family didn't have any  
3 trigger for AMI in the past 24h before the attack (43.1% and 56.9%  
4 respectively). There was no significant difference between the AMI triggers  
5 with cardiovascular disease history in the first-grade family of the patient (P-  
6 value = 0.179).

## 7 **AMI type**

8 Fig. 1 shows the distribution of AMI type in the patients. Anterior STEMI was  
9 the most frequent MI type in patients (45.9%). NSTEMI included 13.4% of all  
10 AMIs. In trigger assessment, there were no significant differences in AMI types  
11 and AMI triggering (P-value = 0.224).

## 12 **Hypercholesterolemia**

13 Over 82% of the AMI patients had hypercholesterolemia (serum total  
14 cholesterol  $\geq$ 130mg/dL). In hypercholesterolemic patients, 26.42% were women  
15 and 73.58% were men but, the difference was not significant through gender (P-  
16 value = 0.18). Also, the total cholesterol level was not significantly different  
17 between the AMI trigger groups (P-value = 0.085).

## 18 **High-Density Lipoprotein (HDL)**

19 We assessed the HDL level based on the patient's gender; So, we determined the  
20 "Low HDL" as <50mg/dL for women and <40mg/dL for men. Our results  
21 indicated that there were no significant differences in low levels of serum HDL  
22 with the type of AMI triggers (P-value = 0.217).

## 23 **Low-Density Lipoprotein (LDL)**

24 In the analysis of serum LDL levels of the patients, our data indicated that there  
25 were no significant differences in serum LDL levels (two groups of normal  
26 LDL and high LDL) with the type of AMI triggers (P-value = 0.056).



## 1 **Serum Triglyceride**

2 Most of the patients with and without abnormal TG didn't have any activity in  
3 the past 24 hours before AMI. We assessed serum TG two times; first, we  
4 grouped patients to normal TG, borderline TG, or high TG levels. The  
5 difference between TG groups and AMI triggers was significant (P-value =  
6 0.035). On the second time, we regrouped patients to normal TG and abnormal  
7 TG (borderline and high). At this time also, the difference between TG groups  
8 and AMI triggers was significant (P-value = 0.018).

## 9 **Season**

10 Considering the one-year study, we assessed the differences in AMI triggers  
11 with differences in the seasons. Our results indicated that the difference between  
12 a season of AMI occurrence and AMI triggers was significant and the physical  
13 triggers decreased in autumn and winter (P-value = 0.013). There were two  
14 peaks of AMI incidence regardless of the triggers; the First one was from  
15 December to March, and the second one was from May to July (Fig. 2).

## 16 **Discussion**

17 In the 21<sup>st</sup> century, despite the progression of medical sciences and technology  
18 advances, cardiovascular diseases remain major public health problem in  
19 different countries, so that caused 31% of global deaths in 2015 and 7.4 million  
20 of these deaths were due to coronary heart disease [2, 14]. Myocardial infarction  
21 is a type of coronary heart disease that is defined as necrosis of the heart muscle  
22 resulting from ischemia or supply-demand imbalance [15]. There are some  
23 definite risk factors such as diabetes, hypertension, abnormal obesity, impaired  
24 lipid profile, smoking, and psychological stresses [16-21]. But still, the one  
25 question remains unanswered. Are there some factors that may induce  
26 myocardial infarction in individuals with or without risk factors? If yes, what  
27 are they and how important they are? Some studies have been done to answer  
28 the questions. Andrew Smyth and et al, have reported that physical exertion and

1 anger or emotional upset can be external triggers for acute myocardial infarction  
2 in the next 1 hour [22]. In other study, Jeremy Ben-Shoshan et al have reported  
3 MI trigger in 37% of patients with acute MI with majority of physical activity  
4 (67%) as potential trigger [23]. But also there are studies that reported up to half  
5 ratio for triggering or prodromal factors in acute MI [24].

6 Our study revealed 53% of patients with acute MI, had no kind of defined  
7 trigger in the past 24 hours before MI symptoms. Despite the mentioned studies  
8 that have evaluated single or a couple of prodromal factors, in this study, we  
9 assessed all possible and accessible triggering factors candidates, so that the  
10 other 43% had a kind of triggering activity including heavy activity (physical),  
11 insomnia or mental tensions (for a while before symptoms), overeating or noisy  
12 parties, receiving bad news, anger or fighting, overdosing of drugs or opiates to  
13 frequency but due to the small number of patients in most of the subgroups we  
14 regrouped them as three main group of the Physical triggers, the Mental  
15 triggers, and No triggers. The difference between the two sexes was significant  
16 revealing triggers are effective in males susceptible to acute MI three times  
17 more than females but there were no significant differences for age groups.  
18 Monthly and seasonal admission reveals two peaks, the first one in winter and  
19 related to cold weather that is confirmed by previous studies [25, 26], and the  
20 second one was in summer. According to sex and occupational distribution and  
21 the significance of trigger induction in physical triggers related jobs; we  
22 hypothesize that the summer peak maybe is related to an increase in physical  
23 activity due to daylight increase and farming activity. Also, this hypothesis is  
24 confirmed by a sudden decrease after March; Iranian new year holidays or  
25 “Nowrooz” (7 to 15 days) beginning after March 20th same to past studies [24].  
26 By the way, living area differences revealed a significant relationship that can  
27 be related to civic and urban living daily stresses. Hypertriglyceridemia is a  
28 major risk factor for cardiovascular disease and in our study, it has been

1 demonstrated that despite hypercholesterolemia, patients with  
2 hypercholesterolemia have a significant risk for MI induced by prodromal  
3 triggers. According to our findings, in patients with a history of diabetes, the  
4 mentioned triggers would not induce acute MI. In diabetic patients, this may  
5 relate to autonomic neuropathy [27, 28] but we cannot be certain about that. In  
6 this study, we couldn't find a significant relationship between age, BMI,  
7 diabetes mellitus, hypertension, familial history of cardiovascular diseases, AMI  
8 type, hypercholesterolemia, low HDL levels, and high LDL levels but the  
9 results revealed significant differences in AMI triggers with ejection fraction  
10 (EF), gender, residency and living area, occupation, smoking, abnormal serum  
11 TG levels and the season of AMI occurrence.

12 In this study, we concluded that in addition to classic risk factors of ischemic  
13 heart disease and myocardial infarction, health care systems and physicians  
14 must pay more attention to triggers that may induce an acute myocardial  
15 infarction in people with predisposing factors specially in male sex, stressful  
16 and hand working jobs, and psychological and mental tension patients.

## 17 **Funding**

18 This study was funded by Urmia University of Medical Sciences and there is no  
19 other organizational or governmental funding.

## 20 **Acknowledgements**

21 We would like to thank the health care personnel of Seyedoshohada heart  
22 center, specially the angiography and echocardiography ward personnel.

## 23 **Conflict of Interest**

24 All of authors report no kind of conflict of interests in this study and there is  
25 nothing to disclose.

## 1 **Clinical Significance**

- 2 • Physical and mental triggers can be found in almost half of acute myocardial
- 3 infarctions.
- 4 • Health care systems can decrease a great fraction of risk for acute
- 5 myocardial infarctions, by educations and health care preventions of these
- 6 triggers.

## 7 **Contributorship Statement**

8 In this study all authors have contributed equally in idea development, design,

9 data collection, study performance, writing the draft and review.

## 10 **Patient and Public Involvement**

11 The study was supported by a patient advisory group which provided input to

12 the program of research. This patient advisory group met on a regular basis for

13 the duration of the study. Patients partnered with us for the design of the study,

14 the informational material to support the intervention, and the burden of the

15 intervention from the patient's perspective. At the end of the study, the patient

16 advisory group commented on the findings and contributed to the dissemination

17 plan.

## 18 **References**

- 19 1. Zipes DPa, Libby Pa, Bonow ROa, Mann DLa, Tomaselli GFa, Braunwald EHd. Braunwald's heart
- 20 disease : a textbook of cardiovascular medicine. Eleventh edition / Douglas P. Zipes, Peter Libby,
- 21 Robert O. Bonow, Douglas L. Mann, Gordon F. Tomaselli. ed2019.
- 22 2. Benjamin EJ, Virani SS, Callaway CW, Chamberlain AM, Chang AR, Cheng S, et al. Heart
- 23 Disease and Stroke Statistics-2018 Update: A Report From the American Heart Association.
- 24 *Circulation*. 2018;137(12):e67-e492.
- 25 3. Thygesen K, Alpert JS, Jaffe AS, Simoons ML, Chaitman BR, White HD, et al. Third universal
- 26 definition of myocardial infarction. *Circulation*. 2012;126(16):2020-2035.
- 27 4. Steptoe A, Kivimaki M. Stress and cardiovascular disease: an update on current knowledge. *Annu*
- 28 *Rev Public Health*. 2013;34:337-354.
- 29 5. Colombo A, Proietti R, Culic V, Lipovetzky N, Viecca M, Danna P. Triggers of acute myocardial
- 30 infarction: a neglected piece of the puzzle. *J Cardiovasc Med (Hagerstown)*. 2014;15(1):1-7.
- 31 6. Culic V, Eterovic D, Miric D. Meta-analysis of possible external triggers of acute myocardial
- 32 infarction. *Int J Cardiol*. 2005;99(1):1-8.
- 33 7. Strike PC, Steptoe A. Behavioral and emotional triggers of acute coronary syndromes: a systematic
- 34 review and critique. *Psychosom Med*. 2005;67(2):179-186.
- 35 8. Tofler GH, Muller JE. Triggering of acute cardiovascular disease and potential preventive
- 36 strategies. *Circulation*. 2006;114(17):1863-1872.
- 37 9. Muller JE, Stone PH, Turi ZG, Rutherford JD, Czeisler CA, Parker C, et al. Circadian variation in
- 38 the frequency of onset of acute myocardial infarction. *N Engl J Med*. 1985;313(21):1315-1322.
- 39 10. Steptoe A, Brydon L. Emotional triggering of cardiac events. *Neurosci Biobehav Rev*.
- 40 2009;33(2):63-70.
- 41 11. Smith HW, Liberman HA, Brody SL, Battey LL, Donohue BC, Morris DC. Acute myocardial
- 42 infarction temporally related to cocaine use: clinical, angiographic, and pathophysiologic
- 43 observations. *Annals of Internal Medicine*. 1987;107(1):13-18.
- 44 12. Williams MJ, Stewart RA. Serial angiography in cocaine-induced myocardial infarction. *Chest*.
- 45 1997;111(3):822-824.

- 1 13. Futterman LG, Lemberg L. Anger and acute coronary events. *Am J Crit Care*. 2002;11(6):574-  
2 576.
- 3 14. Roth GA, Huffman MD, Moran AE, Feigin V, Mensah GA, Naghavi M, et al. Global and regional  
4 patterns in cardiovascular mortality from 1990 to 2013. *Circulation*. 2015;132(17):1667-1678.
- 5 15. Kumar Ve, Abbas AKe, Aster JCe, Perkins JAi. Robbins basic pathology.
- 6 16. Teo KK, Ounpuu S, Hawken S, Pandey MR, Valentin V, Hunt D, et al. Tobacco use and risk of  
7 myocardial infarction in 52 countries in the INTERHEART study: a case-control study. *Lancet*.  
8 2006;368(9536):647-658.
- 9 17. Yusuf S, Hawken S, Ounpuu S, Bautista L, Franzosi MG, Commerford P, et al. Obesity and the  
10 risk of myocardial infarction in 27,000 participants from 52 countries: a case-control study. *Lancet*.  
11 2005;366(9497):1640-1649.
- 12 18. Yusuf S, Hawken S, Ounpuu S, Dans T, Avezum A, Lanas F, et al. Effect of potentially  
13 modifiable risk factors associated with myocardial infarction in 52 countries (the INTERHEART  
14 study): case-control study. *Lancet*. 2004;364(9438):937-952.
- 15 19. Anand SS, Islam S, Rosengren A, Franzosi MG, Steyn K, Yusufali AH, et al. Risk factors for  
16 myocardial infarction in women and men: insights from the INTERHEART study. *Eur Heart J*.  
17 2008;29(7):932-940.
- 18 20. Iqbal R, Anand S, Ounpuu S, Islam S, Rangarajan S, Yusuf S, editors. Independent Protective  
19 Effects of Fruit and Vegetable Intake on Myocardial Infarction in 52 Countries: Results of the  
20 INTERHEART Study. Vancouver, BC: Canadian Cardiovascular Congress (CCC); 2006.
- 21 21. Rosengren A, Hawken S, Ounpuu S, Sliwa K, Zubaid M, Almahmeed WA, et al. Association of  
22 psychosocial risk factors with risk of acute myocardial infarction in 11119 cases and 13648 controls  
23 from 52 countries (the INTERHEART study): case-control study. *Lancet*. 2004;364(9438):953-962.
- 24 22. Smyth A, O'Donnell M, Lamelas P, Teo K, Rangarajan S, Yusuf S, et al. Physical Activity and  
25 Anger or Emotional Upset as Triggers of Acute Myocardial Infarction: The INTERHEART Study.  
26 *Circulation*. 2016;134(15):1059-1067.
- 27 23. Ben-Shoshan J, Segman-Rosenstveig Y, Arbel Y, Chorin E, Barkagan M, Rozenbaum Z, et al.  
28 Comparison of Triggering and Nontriggering Factors in ST-Segment Elevation Myocardial Infarction  
29 and Extent of Coronary Arterial Narrowing. *Am J Cardiol*. 2016;117(8):1219-1223.
- 30 24. Bodis J, Boncz I, Kriszbacher I. Permanent stress may be the trigger of an acute myocardial  
31 infarction on the first work-day of the week. *Int J Cardiol*. 2010;144(3):423-425.
- 32 25. Madrigano J, Mittleman MA, Baccarelli A, Goldberg R, Melly S, von Klot S, et al. Temperature,  
33 myocardial infarction, and mortality: effect modification by individual- and area-level characteristics.  
34 *Epidemiology*. 2013;24(3):439-446.
- 35 26. Tofield A. Cold weather and myocardial infarction. *European heart journal*. 2017;38(3):140-140.
- 36 27. Vinik AI, Maser RE, Mitchell BD, Freeman R. Diabetic autonomic neuropathy. *Diabetes care*.  
37 2003;26(5):1553-1579.
- 38 28. Vučković-Rebrina S, Barada A, Smirčić-Duvnjak L. Diabetic autonomic neuropathy. *Diabetol*  
39 *Croat*. 2013;42(3):73-79.

## 40 **Figure Legends**

41 Figure 1. Incidence distribution of acute MI type among patients (Descriptive data).

42 Figure 2. Distribution of monthly and seasonal admission of patients with acute MI  
43 (Descriptive data).

## 44 **Text Table**

45 Table 1. Clinical and paraclinical data of the study with analysis for acute MI triggers. \*The  
46 reported values are mean  $\pm$  standard deviation and P-values are estimated based on one-way

- 1 ANOVA. The reported values for other variables in the table are number (%), and P values
- 2 are estimated based on the chi-square test.

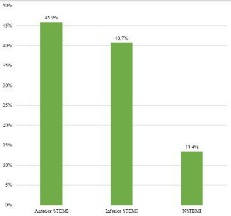

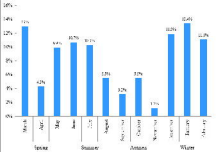

Source: https://www.medrxiv.org/content/10.1101/2020.07.03.20145987v2.full.pdf
